# Supplementary material
Source: PubMed Central journal article supplement (PMC4291766)
Supplement: es503990v_si_001.pdf [file es503990v_si_001.pdf]

# Supporting Information

## Levels of Polycyclic Aromatic Hydrocarbons in Maternal Serum and Risk of Neural Tube Defects in Offspring

Bin Wang <sup>†, #</sup>, Lei Jin <sup>†, #</sup>, Aiguo Ren <sup>†, \*</sup>, Yue Yuan <sup>†</sup>, Jufen Liu <sup>†</sup>, Zhiwen Li <sup>†</sup>, Le Zhang <sup>†</sup>, Deqing Yi <sup>†</sup>, Lin-lin Wang <sup>†</sup>, Yali Zhang <sup>†</sup>, Xilong Wang <sup>§</sup>, Shu Tao <sup>§</sup>, Richard H. Finnell <sup>†, ‡</sup>

<sup>†</sup> Institute of Reproductive and Child Health / Ministry of Health Key Laboratory of Reproductive Health, School of Public Health, Peking University, Beijing 100191, P. R. China

<sup>§</sup> Laboratory for Earth Surface Processes, College of Urban and Environmental Sciences, Peking University, Beijing 100871, P. R. China

<sup>‡</sup> Dell Pediatric Research Institute, Department of Nutritional Sciences, University of Texas at Austin, Austin, TX 78723, USA

<sup>#</sup> These authors contributed equally to this work.

<sup>\*</sup> Corresponding author. Aiguo Ren, Institute of Reproductive and Child Health, Peking University Health Center, Beijing 100191, China. Phone: +86-10-82801140, Fax: +86-10-82801141, E-mail: [renag@pku.edu.cn](mailto:renag@pku.edu.cn).

Number of tables: 4

Number of figure: 1

32 **Solvents and Reagents.**

33 Acetonitrile and *n*-hexane of Ultra Resi-Analyzed<sup>®</sup> were purchased from Merck,  
34 Germany, and acetone and dichloromethane of Suprasolv<sup>®</sup> from J.T. Baker<sup>®</sup>, USA.  
35 Silica gel (100-200 mesh), neutral aluminum oxide (200-300 mesh), and granular  
36 anhydrous sodium sulfate were all obtained from Beijing Chemical Reagent Co.,  
37 China. Anhydrous sodium sulfate was baked at 600°C for 6 h and silica gel and  
38 neutral aluminum oxide were heated at 450°C for 4 h to remove impurities. Silica gel  
39 was further reactivated and kept in a sealed desiccator and heated at 130°C for at least  
40 16 h before use. Granular anhydrous sodium sulfate was stored in a sealed glass bottle  
41 after cleaning. All glassware was cleaned with an ultrasonic cleaner (KQ-500B,  
42 Kunshan, China) for 30 min with liquid detergent, rinsed with distilled water, and  
43 finally baked at 400°C for 6 h.

44 **Extraction and Cleanup for PAH Analysis**

45 PAH extraction was modified by using a microwave extraction system. Briefly,  
46 0.6-1.5 ml serum spiked with two recovery surrogates (2-fluorobiphenyl and  
47 *p*-terphenyl D<sub>14</sub>, J&K Chemical, USA) was extracted with 20 ml acetonitrile using  
48 microwave extraction system (CEM Mars Xpress, USA, 1200 W). The extraction  
49 temperature program was increased from room temperature to 110°C over the course  
50 of 10 min, and held at this temperature for another 10 min. The precipitated lipid was  
51 filtered using a 37 mm (diameter) glass fiber filter (0.22 μm). The filtrate was  
52 transferred to a 250-ml separatory funnel and then extracted with 30 ml *n*-hexane with  
53 a 4% sodium sulfate solution, twice. The extraction (about 60 ml *n*-hexane) was  
54 concentrated to about 1 ml in a rotary evaporator and transferred to a silica/alumina  
55 gel cleanup column (30 cm×10 mm i.d.) containing: 12 cm alumina, 12 cm silica gel,  
56 and 1 cm anhydrous sodium sulfate from bottom to top; conditioned with 10 ml  
57 *n*-hexane). The column was eluted with 50 ml *n*-hexane/dichloromethane (1:1, v/v),  
58 and the eluate was concentrated to about 1 ml and spiked with five mixed internal  
59 standards (naphthalene-d<sub>8</sub>, acenaphthene-d<sub>10</sub>, anthracene-d<sub>10</sub>, chrysene-d<sub>12</sub>, and  
60 perylene-d<sub>12</sub>, J&K Chemical, USA). The extract was further concentrated to about  
61 100 μL in a 250 μL glass intubation tube prior to quantitative analysis. All the

62 extraction and cleanup processes were operated in the fume hood and all the sample  
63 containers were sealed when they were waiting for the next treatment to avoid the  
64 PAH contamination from ambient environment.  
65

66 Table S1. Median concentrations (ng/g lipid) of polycyclic aromatic hydrocarbons (PAHs) in maternal serum by population characteristics in  
 67 Shanxi Province, China, 2010-2013

| Population characteristic                           | Number of subjects <sup>a</sup> | ANY   | ACE   | FLE   | PHE   | ANT   | FLU   | RET   | PYR   | BAA   | CHR   | BBF   | BKF   | BAP   | ΣL-PAHs | ΣH-PAHs | ΣPAHs |
|-----------------------------------------------------|---------------------------------|-------|-------|-------|-------|-------|-------|-------|-------|-------|-------|-------|-------|-------|---------|---------|-------|
| <b>Maternal age(y)</b>                              |                                 |       |       |       |       |       |       |       |       |       |       |       |       |       |         |         |       |
| < 25                                                | 114                             | 168   | 188   | 592   | 937   | 78.9  | 181   | 344   | 293   | 83.9  | 109   | 77.6  | 23.2  | 34.0  | 2851    | 791     | 3421  |
| 25 - 29                                             | 64                              | 136   | 190   | 644   | 1027  | 104   | 234   | 343   | 296   | 106   | 104   | 50.6  | 12.8  | 31.6  | 2713    | 856     | 3666  |
| ≥ 30                                                | 55                              | 101   | 211   | 527   | 1328  | 121   | 330   | 412   | 251   | 103   | 86.9  | 67.9  | 17.4  | 61.5  | 3533    | 808     | 4341  |
| <i>p</i> <sup>b</sup>                               |                                 | 0.568 | 0.877 | 0.806 | 0.186 | 0.026 | 0.225 | 0.797 | 0.837 | 0.515 | 0.828 | 0.774 | 0.557 | 0.128 | 0.536   | 0.665   | 0.618 |
| <b>Maternal prepregnancy BMI (kg/m<sup>2</sup>)</b> |                                 |       |       |       |       |       |       |       |       |       |       |       |       |       |         |         |       |
| < 18.5                                              | 24                              | 210   | 208   | 634   | 969   | 101   | 214   | 482   | 333   | 92    | 134   | 39.7  | 11.1  | 33.5  | 4104    | 994     | 5143  |
| 18.5-24.9                                           | 142                             | 132   | 158   | 514   | 1019  | 84.0  | 191   | 378   | 262   | 70.3  | 85.9  | 71.1  | 19.8  | 35.3  | 2644    | 741     | 3397  |
| ≥ 25                                                | 61                              | 174   | 266   | 765   | 1143  | 117   | 218   | 388   | 332   | 120   | 185   | 86.5  | 23.4  | 50.7  | 3621    | 958     | 4625  |
| <i>p</i> <sup>b</sup>                               |                                 | 0.717 | 0.022 | 0.062 | 0.310 | 0.050 | 0.466 | 0.898 | 0.433 | 0.084 | 0.031 | 0.457 | 0.575 | 0.663 | 0.209   | 0.026   | 0.120 |
| <b>Maternal education</b>                           |                                 |       |       |       |       |       |       |       |       |       |       |       |       |       |         |         |       |
| Primary or lower                                    | 11                              | 19.9  | 165   | 606   | 1542  | 141   | 303   | 581   | 272   | 101   | 84.9  | 55.4  | 13.7  | 100   | 3592    | 749     | 4341  |
| Junior high                                         | 152                             | 163   | 191   | 592   | 1024  | 96.8  | 229   | 426   | 321   | 103   | 118   | 67.0  | 17.0  | 44.2  | 3018    | 836     | 3853  |
| High school or above                                | 74                              | 99.3  | 200   | 521   | 1071  | 89.4  | 124   | 288   | 187   | 74.4  | 84.6  | 78.9  | 26.0  | 22.0  | 2555    | 728     | 2967  |
| <i>p</i> <sup>b</sup>                               |                                 | 0.130 | 0.777 | 0.304 | 0.376 | 0.356 | 0.181 | 0.138 | 0.228 | 0.318 | 0.657 | 0.622 | 0.297 | 0.251 | 0.236   | 0.260   | 0.249 |
| <b>Maternal occupation</b>                          |                                 |       |       |       |       |       |       |       |       |       |       |       |       |       |         |         |       |
| Farmer                                              | 177                             | 144   | 201   | 606   | 1011  | 96.5  | 224   | 427   | 292   | 95.2  | 113   | 61.0  | 19.4  | 54.6  | 2915    | 836     | 3679  |
| Non-farmer                                          | 60                              | 137   | 171   | 476   | 1202  | 91.8  | 139   | 326   | 273   | 94.7  | 97.3  | 87.0  | 25.1  | 20.3  | 2644    | 656     | 3469  |
| <i>p</i> <sup>c</sup>                               |                                 | 0.808 | 0.514 | 0.112 | 0.743 | 0.649 | 0.127 | 0.076 | 0.403 | 0.626 | 0.949 | 0.152 | 0.242 | 0.002 | 0.305   | 0.072   | 0.225 |
| <b>Previous birth defects history</b>               |                                 |       |       |       |       |       |       |       |       |       |       |       |       |       |         |         |       |
| No                                                  | 222                             | 194   | 303   | 1050  | 1198  | 130   | 308   | 688   | 375   | 115   | 200   | 77.3  | 109   | 50.7  | 3844    | 886     | 4625  |
| Yes                                                 | 7                               | 149   | 194   | 603   | 1071  | 93.9  | 209   | 399   | 299   | 95.6  | 107   | 70.9  | 19.8  | 38.0  | 2954    | 812     | 3810  |
| <i>p</i> <sup>c</sup>                               |                                 | 0.621 | 0.921 | 0.995 | 0.531 | 0.141 | 0.609 | 0.713 | 0.706 | 0.954 | 0.767 | 0.476 | 0.292 | 0.488 | 0.768   | 0.281   | 0.664 |

68

69

70 Table S1(Continued)

| Population characteristic               | Number of subjects <sup>a</sup> | ANY   | ACE   | FLE   | PHE   | ANT   | FLU   | RET   | PYR   | BAA   | CHR   | BBF   | BKF   | BAP   | ΣL-PAHs | ΣH-PAHs | ΣPAHs |
|-----------------------------------------|---------------------------------|-------|-------|-------|-------|-------|-------|-------|-------|-------|-------|-------|-------|-------|---------|---------|-------|
| Gravidity                               |                                 |       |       |       |       |       |       |       |       |       |       |       |       |       |         |         |       |
| 1 time                                  | 95                              | 170   | 180   | 552   | 1027  | 89.3  | 194   | 349   | 319   | 86.9  | 106   | 83.8  | 24.7  | 28.5  | 2717    | 820     | 3790  |
| 2 times                                 | 114                             | 131   | 201   | 600   | 1220  | 104   | 212   | 399   | 274   | 103   | 118   | 60.9  | 16.4  | 44.2  | 3018    | 817     | 3778  |
| <i>p</i> <sup>c</sup>                   |                                 | 0.995 | 0.552 | 0.209 | 0.200 | 0.107 | 0.313 | 0.750 | 0.615 | 0.335 | 0.425 | 0.473 | 0.314 | 0.094 | 0.227   | 0.350   | 0.276 |
| Parity                                  |                                 |       |       |       |       |       |       |       |       |       |       |       |       |       |         |         |       |
| 1 time                                  | 196                             | 140   | 191   | 567   | 1051  | 91.3  | 196   | 378   | 289   | 92.3  | 107   | 73.6  | 20.2  | 35.0  | 2789    | 816     | 3734  |
| 2 times                                 | 13                              | 207   | 367   | 1050  | 1285  | 141   | 308   | 566   | 375   | 120   | 178   | 66.5  | 16.5  | 43.2  | 3844    | 877     | 4625  |
| <i>p</i> <sup>c</sup>                   |                                 | 0.390 | 0.278 | 0.384 | 0.394 | 0.024 | 0.476 | 0.600 | 0.433 | 0.300 | 0.600 | 0.678 | 0.760 | 0.881 | 0.476   | 0.366   | 0.444 |
| Periconceptional folate supplementation |                                 |       |       |       |       |       |       |       |       |       |       |       |       |       |         |         |       |
| No                                      | 112                             | 157   | 195   | 629   | 1135  | 99.0  | 218   | 412   | 319   | 86.9  | 95.7  | 71.3  | 20.2  | 47.2  | 3107    | 802     | 4085  |
| Yes                                     | 119                             | 146   | 191   | 532   | 1071  | 94.3  | 199   | 346   | 286   | 101   | 125   | 73.0  | 17.4  | 28.9  | 2851    | 823     | 3734  |
| <i>p</i> <sup>c</sup>                   |                                 | 0.81  | 0.88  | 0.66  | 0.94  | 0.79  | 0.92  | 0.74  | 0.80  | 0.91  | 0.81  | 0.94  | 0.86  | 0.04  | 0.95    | 0.50    | 0.87  |
| Fever or flu during early pregnancy     |                                 |       |       |       |       |       |       |       |       |       |       |       |       |       |         |         |       |
| No                                      | 140                             | 149   | 276   | 729   | 1254  | 119   | 259   | 497   | 301   | 117   | 143   | 92.5  | 32.1  | 52.7  | 3815    | 956     | 5223  |
| Yes                                     | 90                              | 137   | 155   | 484   | 947   | 87.2  | 186   | 306   | 271   | 70.5  | 81.9  | 50.6  | 14.8  | 34.6  | 2477    | 725     | 3052  |
| <i>p</i> <sup>c</sup>                   |                                 | 0.658 | 0.017 | 0.171 | 0.236 | 0.025 | 0.035 | 0.018 | 0.260 | 0.025 | 0.028 | 0.037 | 0.060 | 0.331 | 0.039   | 0.011   | 0.028 |
| Maternal smoking or passive smoking     |                                 |       |       |       |       |       |       |       |       |       |       |       |       |       |         |         |       |
| No                                      | 121                             | 127   | 196   | 591   | 1234  | 111   | 241   | 411   | 282   | 101   | 86.9  | 69.2  | 18.4  | 63.0  | 3318    | 845     | 4109  |
| Yes                                     | 104                             | 141   | 186   | 496   | 905   | 77.5  | 168   | 343   | 275   | 78.4  | 106   | 71.3  | 20.4  | 28.9  | 2550    | 769     | 3468  |
| <i>p</i> <sup>c</sup>                   |                                 | 0.392 | 0.867 | 0.512 | 0.119 | 0.005 | 0.102 | 0.716 | 0.752 | 0.970 | 0.432 | 0.204 | 0.681 | 0.007 | 0.257   | 0.436   | 0.328 |
| Alcohol drinking                        |                                 |       |       |       |       |       |       |       |       |       |       |       |       |       |         |         |       |
| No                                      | 214                             | 132   | 191   | 716   | 1121  | 103   | 212   | 452   | 309   | 92.5  | 99.1  | 59.8  | 17.4  | 56.3  | 2954    | 824     | 3729  |
| Yes                                     | 24                              | 143   | 194   | 568   | 1037  | 93.4  | 199   | 365   | 283   | 92.3  | 106   | 71.9  | 20.1  | 35.0  | 2789    | 787     | 3656  |
| <i>p</i> <sup>c</sup>                   |                                 | 0.77  | 0.72  | 0.87  | 0.73  | 0.64  | 0.62  | 0.91  | 0.88  | 0.67  | 0.77  | 0.24  | 0.63  | 0.21  | 0.70    | 0.86    | 0.67  |

71 The abbreviations of individual PAHs are acenaphthylene (ACY), acenaphthene (ACE), fluorene (FLE), phenanthrene (PHE), anthracene (ANT), fluoranthene (FLU), retene (RET), pyrene  
72 (PYR), benz[a]anthracene (BAA), chrysene (CHR), benzo[b]fluoranthene (BBF), benzo[k]fluoranthene (BKF), benzo[a]pyrene (BAP). ΣL-PAHs is the sum of ANY, ACE, FLE, PHE, ANT,  
73 FLU and RET; ΣH-PAHs of PYR, BAA, CHR, BBF, BKF and BAP; ΣPAHs of ΣL-PAHs and ΣH-PAHs.

74 <sup>a</sup> Total number may not be equal to the number of cases or controls due to missing or unknown data.

75 <sup>b</sup> Calculated by Kruskal-Wallis H Test.

76 <sup>c</sup> Calculated by Mann-Whitney *U* test.

77 **Table S2.** Risks of neural tube defects (NTDs) in association with levels of polycyclic aromatic hydrocarbons (PAHs) of high-molecular weight  
 78 (H-PAHs) and low-molecular weight (L-PAHs) above the median concentration in maternal serum of controls in Shanxi Province, China,  
 79 2010-2013

| PAHs <sup>a</sup> | Median (IQR) <sup>b</sup> | Total NTDs                        |                                         | Anencephaly                       |                                         | Spina bifida                      |                                         |
|-------------------|---------------------------|-----------------------------------|-----------------------------------------|-----------------------------------|-----------------------------------------|-----------------------------------|-----------------------------------------|
|                   |                           | Crude OR <sup>c</sup><br>(95% CI) | Adjusted OR <sup>c, d</sup><br>(95% CI) | Crude OR <sup>c</sup><br>(95% CI) | Adjusted OR <sup>c, d</sup><br>(95% CI) | Crude OR <sup>c</sup><br>(95% CI) | Adjusted OR <sup>c, d</sup><br>(95% CI) |
| ΣL-PAHs           | 2851 (1307-6683)          | 1.22 (0.62-2.40)                  | 1.20 (0.49 -2.92)                       | 0.88 (0.35-2.23)                  | 1.09 (0.27 -4.43)                       | 0.91 (0.41-2.01)                  | 0.94 (0.35-2.55)                        |
| ΣH-PAHs           | 805 (420-1514)            | 4.14 (2.04-8.42) <sup>***</sup>   | 5.03 (1.93-13.1) <sup>**</sup>          | 3.00 (1.13-8.02) <sup>*</sup>     | 4.25 (0.94-19.3)                        | 4.95 (2.06-11.9) <sup>***</sup>   | 4.47 (1.49-13.44) <sup>**</sup>         |

80 OR, odds ratio; IQR, interquartile range; <sup>\*</sup>  $p < 0.05$  and <sup>\*\*\*</sup>  $p < 0.001$ .

81 <sup>a</sup> ΣL-PAHs is the sum of acenaphthylene, acenaphthene, fluorene, phenanthrene, anthracene, fluoranthene, retene; ΣH-PAHs of pyrene, benz[a]anthracene, chrysene,  
 82 benzo[b]fluoranthene, benzo[k]fluoranthene, benzo[a]pyrene.

83 <sup>b</sup> Statistical results of all subjects.

84 <sup>c</sup> Calculated by taking both ΣH-PAHs and ΣL-PAHs together into binary logistic regression model.

85 <sup>d</sup> Adjust for maternal general characteristics and exposure, including BMI, parity, fever of flu during early pregnancy, and active or passive smoking and drinking.

86

87 Table S3. Risks of fetal total neural tube defects (NTDs) in four quartile ranges of controls in Shanxi Province, China, 2010-2013

| PAHs <sup>a</sup> | Concentration group<br>(ng/g lipid) | Total NTDs                             |                                        | Anencephaly                            |                                        | Spinal bifida                          |                                                       |
|-------------------|-------------------------------------|----------------------------------------|----------------------------------------|----------------------------------------|----------------------------------------|----------------------------------------|-------------------------------------------------------|
|                   |                                     | Unadjusted OR <sup>b</sup><br>(95% CI) | Adjusted OR <sup>b,c</sup><br>(95% CI) | Unadjusted OR <sup>b</sup><br>(95% CI) | Adjusted OR <sup>b,c</sup><br>(95% CI) | Unadjusted OR <sup>b</sup><br>(95% CI) | Adjusted OR <sup>b,c</sup><br>(95% CI) <sup>b,c</sup> |
| ΣL-PAHs           | < 1007                              | 1.00                                   | 1.00                                   | 1.00                                   | 1.00                                   | 1.00                                   | 1.00                                                  |
|                   | 1007 - 2068                         | 1.37 (0.58 - 3.26)                     | 1.795 (0.550- 5.86)                    | 0.48 (0.15 - 1.59)                     | 0.50 (0.07 - 3.41)                     | 1.79 (0.62 - 5.15)                     | 2.91 (0.74 - 11.53)                                   |
|                   | 2068 - 3818                         | 1.29 (0.55 - 3.03)                     | 1.710 (0.531- 5.51)                    | 0.37 (0.11 - 1.33)                     | 0.88 (0.17 - 4.54)                     | 1.47 (0.50 - 4.31)                     | 2.41 (0.57 - 10.15)                                   |
|                   | ≥ 3818                              | 4.95 (2.30 - 10.6)***                  | 5.309 (1.929- 14.61)**                 | 2.06 (0.85 - 5.00)                     | 3.07 (0.86 - 11.01)                    | 4.24 (1.64 - 11.0)**                   | 4.50 (1.32 - 15.34)*                                  |
| ΣH-PAHs           | < 300.2                             | 1.00                                   | 1.00                                   | 1.00                                   | 1.00                                   | 1.00                                   | 1.00                                                  |
|                   | 300.2 - 556.8                       | 1.57 (0.57 - 4.33)                     | 1.147 (0.293 - 4.49)                   | 1.63 (0.43 - 6.19)                     | 0.87 (0.12 - 6.07)                     | 1.12 (0.31 - 4.08)                     | 1.56 (0.32 - 7.57)                                    |
|                   | 556.8 - 944.3                       | 3.27 (1.28 - 8.32)*                    | 3.481 (1.068 - 11.34)*                 | 1.91 (0.53 - 6.87)                     | 1.65 (0.30 - 9.15)                     | 2.72 (0.88 - 8.35)                     | 3.06 (0.75 - 12.47)                                   |
|                   | ≥ 944.3                             | 8.92 (3.66 - 21.8)***                  | 8.272 ( 2.727- 25.09)***               | 5.60 (1.73 - 18.2)**                   | 7.39 (1.55 - 35.17)*                   | 7.47 (2.58 - 21.6)***                  | 8.10 (2.14 - 30.64)**                                 |
| ΣPAHs             | < 1406                              | 1.00                                   | 1.00                                   | 1.00                                   | 1.00                                   | 1.00                                   | 1.00                                                  |
|                   | 1406 - 2668                         | 1.27 (0.53 - 3.05)                     | 1.804 (0.549- 5.93)                    | 0.39 (0.11 - 1.40)                     | 0.59 (0.09 - 4.05)                     | 1.62 (0.56 - 4.64)                     | 2.44 (0.63 - 9.52)                                    |
|                   | 2068 - 5065                         | 1.59 (0.67 - 3.78)                     | 2.579 (0.756 - 8.80)                   | 0.64 (0.20 - 2.05)                     | 1.88 (0.34 - 10.47)                    | 1.79 (0.62 - 5.17)                     | 3.74 (0.86 - 16.32)                                   |
|                   | ≥ 5065                              | 4.99 (2.29 - 10.9)***                  | 5.485 ( 1.944- 15.48)**                | 2.14 (0.86 - 5.34)                     | 3.68 (0.93 - 14.52)                    | 3.75 (1.44 - 9.75)**                   | 3.99 (1.17 - 13.66)*                                  |

88 OR, odds ratio

89 <sup>a</sup> ΣL-PAHs is the summery of acenaphthylene, acenaphthene, fluorene, phenanthrene, anthracene, fluoranthene, and retene; ΣH-PAHs of pyrene, benz[a]anthracene,  
 90 chrysene, benzo[b]fluoranthene, benzo[k]fluoranthene, and benzo[a]pyrene; ΣT-PAHs of ΣL-PAHs and ΣH-PAHs.

91 <sup>b</sup> Calculated by using binary logistic regression

92 <sup>c</sup> Adjusted by maternal general characteristics, including BMI, parity, fever of flu during early pregnancy, and active or passive smoking and drinking

93

94

95

96

97 Table S4. Median concentrations (ng/g lipid) of polycyclic aromatic hydrocarbons (PAHs) in the maternal serum in subgroups of life styles and  
 98 energy usage characteristics in Shanxi Province, China, 2010-2013

| Indoor life style or energy usage characteristic | Number of subjects <sup>a</sup> | ANY   | ACE   | FLE   | PHE   | ANT   | FLU   | RET   | PYR   | BAA   | CHR   | BBF   | BKF   | BAP   | ΣL-PAHs | ΣH-PAHs | ΣPAHs |
|--------------------------------------------------|---------------------------------|-------|-------|-------|-------|-------|-------|-------|-------|-------|-------|-------|-------|-------|---------|---------|-------|
| Separate kitchen from living room/bedroom        |                                 |       |       |       |       |       |       |       |       |       |       |       |       |       |         |         |       |
| Yes                                              | 189                             | 155   | 205   | 606   | 1099  | 93.6  | 200   | 395   | 301   | 102   | 128   | 73.5  | 20.7  | 35.5  | 3117    | 820     | 4085  |
| No                                               | 49                              | 95.0  | 153   | 552   | 906   | 108   | 176   | 288   | 236   | 70.0  | 70.9  | 54.8  | 13.8  | 38.9  | 2217    | 702     | 2790  |
| <i>p</i> <sup>b</sup>                            |                                 | 0.386 | 0.153 | 0.967 | 0.66  | 0.945 | 0.729 | 0.246 | 0.474 | 0.152 | 0.066 | 0.118 | 0.304 | 0.336 | 0.401   | 0.124   | 0.297 |
| Primary fuel used for cooking                    |                                 |       |       |       |       |       |       |       |       |       |       |       |       |       |         |         |       |
| Soft coal                                        | 39                              | 170   | 216   | 926   | 1420  | 102   | 263   | 473   | 413   | 110   | 98.2  | 72.4  | 16.3  | 43.3  | 3818    | 886     | 5299  |
| Hard coal                                        | 86                              | 103   | 223   | 592   | 914   | 93.9  | 194   | 358   | 237   | 83.9  | 102   | 55.1  | 13.1  | 34.2  | 2789    | 773     | 3598  |
| Liquefied gas                                    | 97                              | 141   | 163   | 477   | 1080  | 94    | 199   | 349   | 301   | 88    | 108   | 71.3  | 20.1  | 36    | 2662    | 735     | 3392  |
| <i>p</i> <sup>c</sup>                            |                                 | 0.355 | 0.462 | 0.159 | 0.355 | 0.751 | 0.373 | 0.486 | 0.297 | 0.705 | 0.455 | 0.654 | 0.878 | 0.222 | 0.574   | 0.513   | 0.556 |
| Conception during the heating season             |                                 |       |       |       |       |       |       |       |       |       |       |       |       |       |         |         |       |
| Yes                                              | 134                             | 131   | 148   | 480   | 968   | 89    | 187   | 312   | 282   | 70.3  | 87.2  | 67.7  | 17.4  | 40.8  | 2555    | 811.67  | 3307  |
| No                                               | 100                             | 201   | 233   | 772   | 1306  | 106   | 263   | 426   | 331   | 110   | 138   | 74.2  | 24.1  | 35.3  | 3665    | 831     | 4440  |
| <i>p</i> <sup>b</sup>                            |                                 | 0.151 | 0.028 | 0.077 | 0.292 | 0.353 | 0.147 | 0.332 | 0.215 | 0.189 | 0.253 | 0.693 | 0.918 | 0.583 | 0.294   | 0.348   | 0.356 |
| Using a stove for heating <sup>d</sup>           |                                 |       |       |       |       |       |       |       |       |       |       |       |       |       |         |         |       |
| Yes                                              | 77                              | 97.9  | 133   | 483   | 847   | 77.5  | 137   | 273   | 267   | 62.7  | 79.9  | 50.8  | 13.7  | 50.7  | 2318    | 790     | 2790  |
| No                                               | 58                              | 137   | 151   | 444   | 1127  | 99.3  | 204   | 368   | 276   | 86.5  | 103   | 71.1  | 20.5  | 34.4  | 2611    | 808     | 3629  |
| <i>p</i> <sup>b</sup>                            |                                 | 0.164 | 0.496 | 0.779 | 0.099 | 0.709 | 0.225 | 0.533 | 0.578 | 0.262 | 0.179 | 0.430 | 0.629 | 0.425 | 0.411   | 0.919   | 0.408 |
| Stove in the living room/ bedroom <sup>d</sup>   |                                 |       |       |       |       |       |       |       |       |       |       |       |       |       |         |         |       |
| Yes                                              | 47                              | 79.3  | 133   | 468   | 709   | 79.1  | 119   | 273   | 216   | 70.6  | 71.8  | 42.2  | 6.42  | 44.7  | 2169    | 766     | 2661  |
| No                                               | 31                              | 126   | 97.5  | 485   | 967   | 65.2  | 188   | 331   | 284   | 55.2  | 84.9  | 72.4  | 17.4  | 60.0  | 2474    | 826     | 2867  |
| <i>p</i> <sup>b</sup>                            |                                 | 0.849 | 0.858 | 0.798 | 0.787 | 0.649 | 0.833 | 0.975 | 0.866 | 0.247 | 0.597 | 0.863 | 0.954 | 0.716 | 0.744   | 0.842   | 0.683 |
| Primary fuel used for heating <sup>d</sup>       |                                 |       |       |       |       |       |       |       |       |       |       |       |       |       |         |         |       |
| Soft coal                                        | 38                              | 90.5  | 125   | 445   | 638   | 72.6  | 110   | 260   | 186   | 71.5  | 68.4  | 56.7  | 13.4  | 30.6  | 1862    | 724     | 2717  |
| Hard coal                                        | 38                              | 61.9  | 147   | 525   | 902   | 82.5  | 136   | 371   | 282   | 58.7  | 77.0  | 48.6  | 13.1  | 77.8  | 2551    | 824     | 3468  |
| <i>p</i> <sup>b</sup>                            |                                 | 0.797 | 0.410 | 0.803 | 0.540 | 0.516 | 0.954 | 0.431 | 0.942 | 0.665 | 0.601 | 0.741 | 0.983 | 0.472 | 0.245   | 0.519   | 0.299 |



100 Table S4 (Continued)

| Indoor life style or energy usage characteristic                  | Number of subjects <sup>a</sup> | ANY   | ACE   | FLE   | PHE   | ANT   | FLU   | RET   | PYR   | BAA   | CHR   | BBF   | BKF   | BAP   | ΣL-PAHs | ΣH-PAHs | ΣPAHs |
|-------------------------------------------------------------------|---------------------------------|-------|-------|-------|-------|-------|-------|-------|-------|-------|-------|-------|-------|-------|---------|---------|-------|
| Frequency of ventilation in the living room/bedroom <sup>d</sup>  |                                 |       |       |       |       |       |       |       |       |       |       |       |       |       |         |         |       |
| Everyday                                                          | 58                              | 143   | 169   | 476   | 812   | 72.1  | 143   | 295   | 276   | 69.5  | 82.4  | 49.8  | 13.4  | 39.4  | 2471    | 757     | 2781  |
| 1 - 6 times per week                                              | 15                              | 38.0  | 30.1  | 419   | 906   | 77.5  | 114   | 149   | 179   | 58    | 65.4  | 22.2  | 5.8   | 132   | 2087    | 811     | 2817  |
| <i>p</i> <sup>b</sup>                                             |                                 | 0.052 | 0.005 | 0.265 | 0.795 | 0.816 | 0.778 | 0.122 | 0.185 | 0.255 | 0.411 | 0.313 | 0.469 | 0.593 | 0.409   | 0.712   | 0.517 |
| Frequency of combustion exhausted gas in living room <sup>d</sup> |                                 |       |       |       |       |       |       |       |       |       |       |       |       |       |         |         |       |
| Everyday                                                          | 18                              | 72.1  | 223   | 381   | 561   | 91.0  | 105   | 263   | 181   | 64.5  | 75.9  | 0.0   | 0.0   | 137   | 1862    | 641     | 2514  |
| 1 - 6 times per week                                              | 9                               | 0     | 0     | 483   | 906   | 79.1  | 303   | 261   | 248   | 72.4  | 65.4  | 41.7  | 0.5   | 43.3  | 1719    | 790     | 2313  |
| ≤ 1 time per week                                                 | 45                              | 151   | 118   | 601   | 907   | 71.1  | 135   | 273   | 323   | 62.7  | 63.7  | 72.4  | 19.4  | 25.6  | 2634    | 820     | 3321  |
| <i>p</i> <sup>c</sup>                                             |                                 | 0.163 | 0.052 | 0.811 | 0.810 | 0.970 | 0.336 | 0.745 | 0.710 | 0.555 | 0.883 | 0.171 | 0.194 | 0.587 | 0.717   | 0.805   | 0.580 |

101 The abbreviations of individual PAHs are acenaphthylene (ACY), acenaphthene (ACE), fluorene (FLE), phenanthrene (PHE), anthracene (ANT), fluoranthene (FLU), retene (RET), pyrene  
 102 (PYR), benz[a]anthracene (BAA), chrysene (CHR), benzo[b]fluoranthene (BBF), benzo[k]fluoranthene (BKF), benzo[a]pyrene (BAP). ΣL-PAHs is the sum of ANY, ACE, FLE, PHE, ANT,  
 103 FLU and RET; ΣH-PAHs of PYR, BAA, CHR, BBF, BKF and BAP; ΣPAHs of ΣL-PAHs and ΣH-PAHs.

104 <sup>a</sup> Total number may not be equal to the number of cases or controls due to missing or unknown data.

105 <sup>b</sup> Calculated by Mann-Whiney *U* test

106 <sup>c</sup> Calculated by Kruskal-Wallis H Test

107 <sup>d</sup> For women whose pregnancies occurred during the winter heating season.

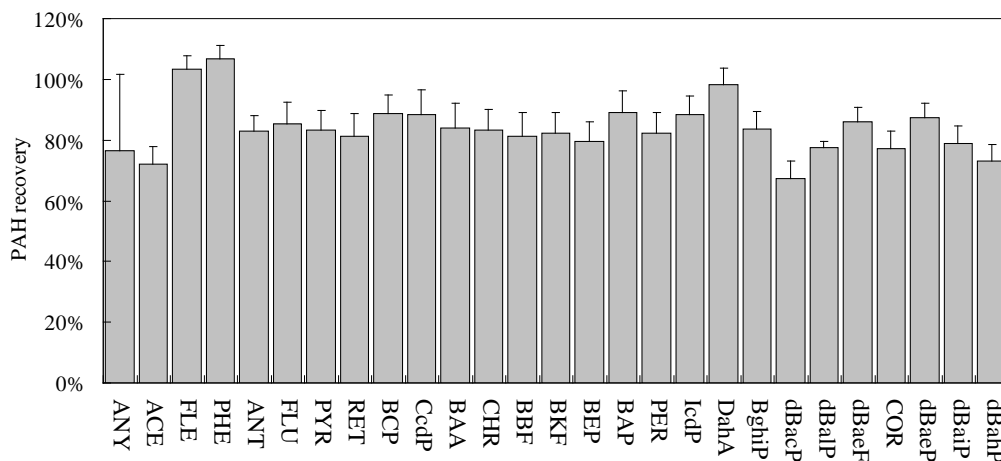

Figure S1. The method recoveries of the twenty-seven spiked PAHs with serum. The data were shown as mean  $\pm$  standard error. The abbreviation of PAHs are acenaphthylene (ACY), acenaphthene (ACE), fluorene (FLE), phenanthrene (PHE), anthracene (ANT), fluoranthene (FLU), retene (RET), pyrene (PYR), benzo(c)phenanthrene (BCP), cyclopenta(c,d)pyrene (CcdP), benzo(a)anthracene (BAA), chrysene (CHR), benzo(b)fluoranthene (BBF), benzo(k)fluoranthene (BKF), benzo(e)pyrene (BEP), benzo(a)pyrene (BAP), Perylene (PER), indeno(1,2,3-cd)pyrene (IcdP), dibenz(a,h)anthracene (DahA), benzo(g,h,i]perylene (BghiP), di-benzo(a,c)pyrene (dBacP), di-benzo(a,l)pyrene (dBaIP), dibenzo(a,e)fluoranthene (dBaeF), coronene (COR), di-benzo(a,e)pyrene (dBaeP), di-benzo(a,i)pyrene (dBaiP), and di-benzo(a,h)pyrene (dBahP).
